# Supplementary material
Source: PubMed Central journal article supplement (PMC4126411)
Supplement: NIHMS572461-supplement-supplement_1.pdf [file NIHMS572461-supplement-supplement_1.pdf]

**Figure S1:****Location of Illumina 450K CpG Sites on *FKBP5*****Relative to Sites Previously Examined in the Literature**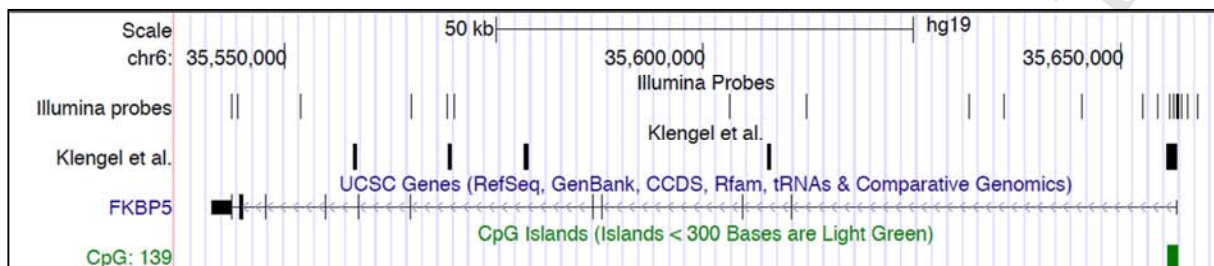

<http://genome.ucsc.edu> (GRCh37/hg19)

**Figure S2****Location of Illumina 450K CpG Sites on *NR3C1*****Relative to Sites Previously Examined in the Literature**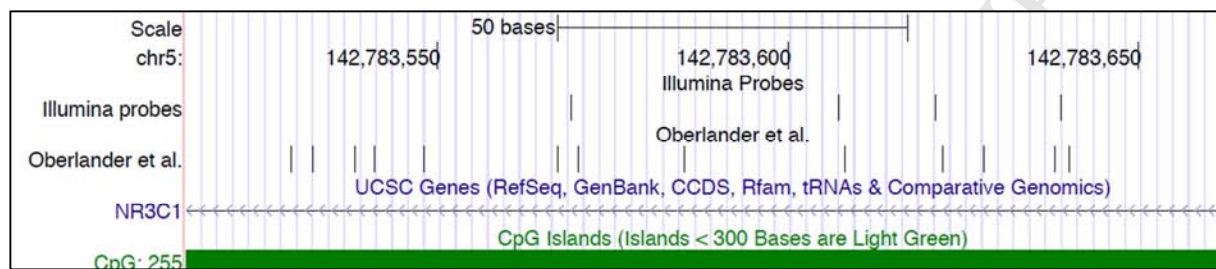

<http://genome.ucsc.edu> (GRCh37/hg19)

Table S1

**Group Differences Between Maltreated and Control Children and Associations between Children's Depression Scores and Methylation in CpG Sites in *SLC6A4*, *BDNF*, *NR3CI* and *FKBP5***

| <i>SLC6A4</i> Sites | Maltreated vs. Control Group Differences |                       | Predictor of Depression Severity Score |                       | CpG Location  |
|---------------------|------------------------------------------|-----------------------|----------------------------------------|-----------------------|---------------|
|                     | Uncorrected Significance                 | Bonferroni Correction | Uncorrected Significance               | Bonferroni Correction |               |
| cg25725890          | 0.389547077                              | ns                    | 0.009375991                            | ns                    | TSS200        |
| cg22584138          | 0.890677671                              | ns                    | 0.017763675                            | ns                    | 5'UTR         |
| cg18584905          | 0.362947352                              | ns                    | 0.044410081                            | ns                    | TSS1500       |
| cg03363743          | 0.606875611                              | ns                    | 0.126198768                            | ns                    | 5'UTR         |
| cg24984698          | 0.166207482                              | ns                    | 0.286084111                            | ns                    | Body          |
| cg01330016          | 0.563631422                              | ns                    | 0.422569194                            | ns                    | 5'UTR         |
| cg20592995          | 0.007292171                              | ns                    | 0.424334536                            | ns                    | 3'UTR         |
| cg14692377          | 0.042962662                              | ns                    | 0.498005157                            | ns                    | 1stExon;5'UTR |
| cg26126367          | 0.119189965                              | ns                    | 0.530719827                            | ns                    | 5'UTR         |
| cg05016953          | 0.363220673                              | ns                    | 0.569368012                            | ns                    | 1stExon;5'UTR |
| cg05951817          | 0.588369197                              | ns                    | 0.601353988                            | ns                    | 5'UTR         |
| cg10901968          | 0.981190937                              | ns                    | 0.619723094                            | ns                    | TSS200        |
| cg06841846          | 0.214420909                              | ns                    | 0.840393939                            | ns                    | TSS1500       |
| cg27569822          | 0.461393774                              | ns                    | 0.864032558                            | ns                    | TSS200        |
| cg12074493          | 0.103272514                              | ns                    | 0.968488712                            | ns                    | TSS1500       |
| cg26741280          | 0.058636884                              | ns                    | 0.97783844                             | ns                    | TSS200        |

**Note:** The 450K BeadChip does not include any CpG sites in the promoter region of *SLC6A4*, so a test for replication with prior research findings is not feasible. Bonferroni significance set at .003 for *SLC6A4* (16 CpG sites); Significance after controlling for demographic factors.

| <i>BDNF</i> Sites | Maltreated vs. Control Group Differences |                       | Predictor of Depression Severity Score |                       | CpG Location               |
|-------------------|------------------------------------------|-----------------------|----------------------------------------|-----------------------|----------------------------|
|                   | Uncorrected Significance                 | Bonferroni Correction | Uncorrected Significance               | Bonferroni Correction |                            |
| cg25962210        | 0.148960564                              | ns                    | 0.020507296                            | ns                    | Body;5'UTR;TSS200          |
| cg00298481        | 0.000557109                              | Significant           | 0.028709789                            | ns                    | 5'UTR;TSS200;Body;TSS1500  |
| cg10635145        | 0.14659086                               | ns                    | 0.02908057                             | ns                    | 5'UTR;TSS200;Body;TSS1500  |
| cg23619332        | 0.023205762                              | ns                    | 0.039309183                            | ns                    | 5'UTR;TSS200;Body;TSS1500  |
| cg04106006        | 0.142973911                              | ns                    | 0.041643427                            | ns                    | 5'UTR;TSS200;Body;TSS1500  |
| cg20954537        | 0.150810252                              | ns                    | 0.054886979                            | ns                    | Body;5'UTR;TSS1500         |
| cg11718030        | 0.058877206                              | ns                    | 0.064524889                            | ns                    | TSS1500                    |
| cg07704699        | 0.223299722                              | ns                    | 0.06755146                             | ns                    | Body;TSS1500               |
| cg15914769        | 0.013072878                              | ns                    | 0.069687082                            | ns                    | TSS200;TSS1500             |
| cg08362738        | 0.035693931                              | ns                    | 0.096556257                            | ns                    | 5'UTR;TSS200;Body;TSS1500  |
| cg21010859        | 0.000343308                              | Significant           | 0.1030634                              | ns                    | Body;5'UTR                 |
| cg05189570        | 0.126257248                              | ns                    | 0.111817901                            | ns                    | Body;5'UTR;1stExon         |
| cg24377657        | 0.002917329                              | ns                    | 0.122568359                            | ns                    | TSS1500;Body;5'UTR;TSS200  |
| cg24065044        | 0.005555087                              | ns                    | 0.13900972                             | ns                    | TSS1500;Body;5'UTR         |
| cg12448003        | 0.028474844                              | ns                    | 0.15344048                             | ns                    | Body;TSS1500;TSS200        |
| cg25412831        | 0.039189333                              | ns                    | 0.178482374                            | ns                    | Body;5'UTR;TSS1500;1stExon |
| cg15462887        | 0.657220934                              | ns                    | 0.183028344                            | ns                    | TSS1500                    |
| cg25328597        | 0.552470319                              | ns                    | 0.186466565                            | ns                    | TSS200;Body;5'UTR;TSS1500  |
| cg05818894        | 0.247413162                              | ns                    | 0.187061209                            | ns                    | Body;5'UTR                 |
| cg27193031        | 0.10934742                               | ns                    | 0.207814321                            | ns                    | Body;1stExon;5'UTR         |
| cg02613510        | 0.211746516                              | ns                    | 0.238614422                            | ns                    | Body;5'UTR;TSS1500         |
| cg15688670        | 0.107325261                              | ns                    | 0.251216822                            | ns                    | TSS1500;Body;5'UTR;TSS200  |
| cg01418645        | 0.031908348                              | ns                    | 0.262345561                            | ns                    | Body                       |
| cg06991510        | 0.772728099                              | ns                    | 0.274757776                            | ns                    | Body;TSS1500;5'UTR;TSS200  |
| cg01225698        | 0.0000129                                | Significant           | 0.27917886                             | ns                    | Body;TSS1500;TSS200        |
| cg06816235        | 0.000473413                              | Significant           | 0.28144659                             | ns                    | Body;5'UTR;TSS1500;1stExon |
| cg15014679        | 0.023341201                              | ns                    | 0.290533862                            | ns                    | Body;5'UTR                 |
| cg22043168        | 0.00011159                               | Significant           | 0.30060822                             | ns                    | Body;5'UTR;5'UTR;1stExon   |
| cg07238832        | 0.250154077                              | ns                    | 0.323235813                            | ns                    | Body;5'UTR;Body;TSS1500    |
| cg16257091        | 0.065911525                              | ns                    | 0.328988544                            | ns                    | TSS1500;1stExon;5'UTR      |
| cg18867480        | 0.041518355                              | ns                    | 0.330180292                            | ns                    | TSS1500                    |
| cg01642653        | 0.889787755                              | ns                    | 0.347888785                            | ns                    | TSS1500;1stExon;5'UTR      |
| cg24249411        | 0.029591783                              | ns                    | 0.359233193                            | ns                    | TSS1500                    |
| cg09606766        | 0.63313769                               | ns                    | 0.38585578                             | ns                    | TSS1500;Body;5'UTR;TSS1500 |
| cg27351358        | 0.00467074                               | ns                    | 0.392241455                            | ns                    | TSS1500;1stExon;5'UTR      |
| cg18595174        | 0.000771768                              | ns                    | 0.400139989                            | ns                    | Body;5'UTR                 |
| cg14291693        | 0.002609618                              | ns                    | 0.414334195                            | ns                    | Body;5'UTR                 |
| cg05733135        | 0.005146437                              | ns                    | 0.416264112                            | ns                    | Body;5'UTR                 |
| cg25457956        | 0.030943413                              | ns                    | 0.419027337                            | ns                    | TSS200;TSS1500             |
| cg11241206        | 0.128532073                              | ns                    | 0.427020778                            | ns                    | TSS1500;Body;5'UTR;1stExon |
| cg20108357        | 0.106184987                              | ns                    | 0.427040518                            | ns                    | Body;5'UTR                 |
| cg14589148        | 0.00079039                               | ns                    | 0.438135311                            | ns                    | TSS200;TSS1500             |
| cg06684850        | 0.005465605                              | ns                    | 0.467552665                            | ns                    | Body;TSS1500;TSS200        |
| cg04672351        | 0.450442775                              | ns                    | 0.470239527                            | ns                    | TSS1500;Body;5'UTR;1stExon |

| <i>BDNF</i> Sites | Maltreated vs. Control Group Differences |                       | Predictor of Depression Severity Score |                       | CpG Location               |
|-------------------|------------------------------------------|-----------------------|----------------------------------------|-----------------------|----------------------------|
|                   | Uncorrected Significance                 | Bonferroni Correction | Uncorrected Significance               | Bonferroni Correction |                            |
| cg07159484        | 0.001236769                              | ns                    | 0.49293865                             | ns                    | Body;5'UTR;1stExon;TSS200  |
| cg26949694        | 0.377345425                              | ns                    | 0.51315985                             | ns                    | Body;TSS1500;1stExon;5'UTR |
| cg03747251        | 0.00000742                               | Significant           | 0.533941568                            | ns                    | TSS200;TSS1500;Body;5'UTR  |
| cg06260077        | 0.307915617                              | ns                    | 0.549126505                            | ns                    | Body;5'UTR;TSS200          |
| cg23426002        | 0.007019715                              | ns                    | 0.552944591                            | ns                    | Body                       |
| cg09492354        | 0.817219078                              | ns                    | 0.564147055                            | ns                    | Body;5'UTR                 |
| cg15710245        | 0.00000935                               | Significant           | 0.57872989                             | ns                    | TSS200;Body;5'UTR;TSS1500  |
| cg25381667        | 0.031851159                              | ns                    | 0.582690755                            | ns                    | TSS200;TSS1500             |
| cg08388004        | 0.116936987                              | ns                    | 0.590928634                            | ns                    | Body                       |
| cg23497217        | 0.002196795                              | ns                    | 0.599162536                            | ns                    | TSS1500;Body;5'UTR;TSS200  |
| cg03984780        | 0.009619105                              | ns                    | 0.599429881                            | ns                    | TSS200;Body;5'UTR;TSS1500  |
| cg06025631        | 0.008003534                              | ns                    | 0.6250328                              | ns                    | Body;TSS200;5'UTR; TSS1500 |
| cg18117895        | 0.037366543                              | ns                    | 0.626348621                            | ns                    | Body;5'UTR;TSS200;TSS1500  |
| cg24650785        | 0.0000197                                | Significant           | 0.654835065                            | ns                    | Body;TSS1500;5'UTR;1stExon |
| cg06979684        | 0.017061052                              | ns                    | 0.671790686                            | ns                    | 3'UTR;1stExon;Body         |
| cg26057780        | 0.099601076                              | ns                    | 0.709230963                            | ns                    | Body;5'UTR;TSS200          |
| cg11806762        | 0.006052462                              | ns                    | 0.740428343                            | ns                    | Body;5'UTR                 |
| cg02527472        | 0.22502039                               | ns                    | 0.752372802                            | ns                    | TSS1500;1stExon;5'UTR      |
| cg10022526        | 0.453195175                              | ns                    | 0.788322515                            | ns                    | TSS1500                    |
| cg15313332        | 0.538617606                              | ns                    | 0.81797577                             | ns                    | Body;5'UTR;TSS200R         |
| cg13974632        | 0.036178462                              | ns                    | 0.852902569                            | ns                    | Body;5'UTR                 |
| cg01583131        | 0.034589838                              | ns                    | 0.856446599                            | ns                    | TSS1500                    |
| cg01636003        | 0.018513732                              | ns                    | 0.864585633                            | ns                    | TSS1500;Body;5'UTR         |
| cg23947039        | 0.000164476                              | Significant           | 0.867265182                            | ns                    | Body;5'UTR;TSS200;TSS1500  |
| cg10558494        | 0.589713883                              | ns                    | 0.869104723                            | ns                    | Body;5'UTR;TSS200          |
| cg17413943        | 0.179279859                              | ns                    | 0.921298129                            | ns                    | Body;5'UTR                 |
| cg03167496        | 0.143323283                              | ns                    | 0.933131655                            | ns                    | TSS200;TSS1500             |
| cg20340655        | 0.869652263                              | ns                    | 0.934905121                            | ns                    | TSS1500;Body;5'UTR;1stExon |
| cg04481212        | 0.210920383                              | ns                    | 0.938996435                            | ns                    | Body;5'UTR                 |
| cg06046431        | 0.201799568                              | ns                    | 0.939515731                            | ns                    | TSS1500                    |
| cg18354203        | 0.043632706                              | ns                    | 0.952418477                            | ns                    | Body;5'UTR                 |
| cg05218375        | 0.007188174                              | ns                    | 0.972883503                            | ns                    | TSS1500;Body;5'UTR;TSS200  |
| cg26840770        | 0.010643066                              | ns                    | 0.976212265                            | ns                    | TSS1500;Body;5'UTR;TSS200  |

**Note:** Bonferroni significance set at .00065 for *BDNF* (77 CpG sites) ; Significance after controlling for demographic factors.

| <i>NR3C1</i> Sites | Maltreated vs. Control Group Differences |                       | Predictor of Depression Severity Score |                       | CpG Location        |
|--------------------|------------------------------------------|-----------------------|----------------------------------------|-----------------------|---------------------|
|                    | Uncorrected Significance                 | Bonferroni Correction | Uncorrected Significance               | Bonferroni Correction |                     |
| cg11152298         | 0.000514005                              | Significant           | 0.007245998                            | ns                    | Promoter_Associated |
| cg07733851         | 0.096474453                              | ns                    | 0.029673053                            | ns                    | Promoter_Associated |
| cg06521673         | 0.001966007                              | ns                    | 0.085889227                            | ns                    | 5'UTR               |
| cg18849621         | 0.001721291                              | ns                    | 0.097944081                            | ns                    | Promoter_Associated |
| cg03857453         | 0.283607981                              | ns                    | 0.119954731                            | ns                    | Body                |
| cg16586394         | 0.003905033                              | ns                    | 0.136234215                            | ns                    | Body                |
| cg08818984         | 0.096333071                              | ns                    | 0.169543704                            | ns                    | Promoter_Associated |
| cg00629244         | 0.338032142                              | ns                    | 0.203578753                            | ns                    | Promoter_Associated |
| cg20753294         | 0.214111138                              | ns                    | 0.209441883                            | ns                    | 1stExon;5'UTR       |
| cg18068240         | 0.053022202                              | ns                    | 0.229798544                            | ns                    | Promoter_Associated |
| cg13648501         | 0.0000691                                | Significant           | 0.303157839                            | ns                    | Promoter_Associated |
| cg06952416         | 0.011228949                              | ns                    | 0.344343845                            | ns                    | Promoter_Associated |
| cg15910486         | 0.003149538                              | ns                    | 0.359899641                            | ns                    | Promoter_Associated |
| cg12466613         | 0.00389258                               | ns                    | 0.38332975                             | ns                    | TSS1500             |
| cg21702128         | 0.0000107                                | Significant           | 0.430251048                            | ns                    | Promoter_Associated |
| cg14558428         | 0.079998106                              | ns                    | 0.445535838                            | ns                    | Promoter_Associated |
| cg17860381         | 0.000588729                              | Significant           | 0.477987609                            | ns                    | Promoter_Associated |
| cg25535999         | 0.008783015                              | ns                    | 0.491526029                            | ns                    | Body                |
| cg04111177         | 0.000000219                              | Significant           | 0.522112775                            | ns                    | Promoter_Associated |
| cg18998365         | 0.279758979                              | ns                    | 0.531264979                            | ns                    | Promoter_Associated |
| cg24026230         | 0.046826622                              | ns                    | 0.557433876                            | ns                    | Promoter_Associated |
| cg26720913         | 0.231614305                              | ns                    | 0.584930345                            | ns                    | Promoter_Associated |
| cg18019515         | 0.051751654                              | ns                    | 0.624242757                            | ns                    | Promoter_Associated |
| cg07528216         | 0.069531579                              | ns                    | 0.627095119                            | ns                    | 5'UTR               |
| cg18146873         | 0.00262041                               | ns                    | 0.674449501                            | ns                    | 1stExon;5'UTR       |
| cg07589972         | 0.015769704                              | ns                    | 0.686431242                            | ns                    | TSS1500             |
| cg06968181         | 0.953625703                              | ns                    | 0.743809595                            | ns                    | Promoter_Associated |
| cg23273257         | 0.023373748                              | ns                    | 0.754958769                            | ns                    | 3'UTR               |
| cg08845721         | 0.136636243                              | ns                    | 0.817967173                            | ns                    | 5'UTR               |
| cg27107893         | 0.15671811                               | ns                    | 0.819298735                            | ns                    | Body                |
| cg15645634         | 0.0000446                                | Significant           | 0.835603366                            | ns                    | Promoter_Associated |
| cg18484679         | 0.013710222                              | ns                    | 0.850485782                            | ns                    | Body                |
| cg17342132         | 0.863237026                              | ns                    | 0.860313386                            | ns                    | Promoter_Associated |
| cg19457823         | 0.025924253                              | ns                    | 0.867711695                            | ns                    | Body                |
| cg16335926         | 0.843628055                              | ns                    | 0.871456264                            | ns                    | Promoter_Associated |
| cg27345592         | 0.004833828                              | ns                    | 0.886590373                            | ns                    | 5'UTR               |
| cg17617527         | 0.110096996                              | ns                    | 0.932152634                            | ns                    | 5'UTR               |
| cg06613263         | 0.04847934                               | ns                    | 0.934776774                            | ns                    | Body                |
| cg26464411         | 0.003539604                              | ns                    | 0.948562712                            | ns                    | Promoter_Associated |
| cg10847032         | 0.117169097                              | ns                    | 0.952378569                            | ns                    | Promoter_Associated |
| cg27122725         | 0.135298329                              | ns                    | 0.953684151                            | ns                    | Promoter_Associated |

**Note:** Bonferroni significance set at .001 for *NR3C1* (41 CpG sites); Significance after controlling for demographic factors.

| <i>FKBP5</i> site | Maltreated vs. Control Group Differences |                       | Predictor of Depression Severity Score |                       | CpG Location        |
|-------------------|------------------------------------------|-----------------------|----------------------------------------|-----------------------|---------------------|
|                   | Uncorrected Significance                 | Bonferroni Correction | Uncorrected Significance               | Bonferroni Correction |                     |
| cg08915438        | 0.301765811                              | ns                    | 0.019567564                            | ns                    | Body                |
| cg08636224        | 0.212124561                              | ns                    | 0.027355404                            | ns                    | 5'UTR               |
| cg00862770        | 0.981001487                              | ns                    | 0.050908687                            | ns                    | Promoter Associated |
| cg06087101        | 0.927864506                              | ns                    | 0.087863315                            | ns                    | Body                |
| cg00610228        | 0.0000979                                | Significant           | 0.09667896                             | ns                    | Promoter Associated |
| cg25114611        | 0.0000424                                | Significant           | 0.124552096                            | ns                    | Promoter Associated |
| cg16052510        | 0.246977086                              | ns                    | 0.182948128                            | ns                    | Body                |
| cg17085721        | 0.107141894                              | ns                    | 0.206640507                            | ns                    | 5'UTR               |
| cg14642437        | 0.069897722                              | ns                    | 0.263292328                            | ns                    | Promoter Associated |
| cg03591753        | 0.153801721                              | ns                    | 0.296422536                            | ns                    | 5'UTR               |
| cg07485685        | 0.947515722                              | ns                    | 0.319104319                            | ns                    | Promoter Associated |
| cg19226017        | 0.290309624                              | ns                    | 0.363997377                            | ns                    | Promoter Associated |
| cg00130530        | 0.980905893                              | ns                    | 0.394927091                            | ns                    | Promoter Associated |
| cg07843056        | 0.094112971                              | ns                    | 0.465704551                            | ns                    | Promoter Associated |
| cg01294490        | 0.070552234                              | ns                    | 0.492693295                            | ns                    | Promoter Associated |
| cg03546163        | 0.067252111                              | ns                    | 0.504722822                            | ns                    | 5'UTR               |
| cg00052684        | 0.296682857                              | ns                    | 0.565458655                            | ns                    | 5'UTR               |
| cg06937024        | 0.003010829                              | ns                    | 0.569006171                            | ns                    | Promoter Associated |
| cg20813374        | 0.264103036                              | ns                    | 0.578380658                            | ns                    | Promoter Associated |
| cg10913456        | 0.591837481                              | ns                    | 0.600712636                            | ns                    | Promoter Associated |
| cg18726036        | 0.000560558                              | Significant           | 0.601827263                            | ns                    | 3'UTR               |
| cg17030679        | 0.237980508                              | ns                    | 0.604358676                            | ns                    | Promoter Associated |
| cg10300814        | 0.32407941                               | ns                    | 0.617369297                            | ns                    | Body                |
| cg14284211        | 0.100769754                              | ns                    | 0.625299877                            | ns                    | Body                |
| cg07061368        | 0.053756916                              | ns                    | 0.640872399                            | ns                    | 5'UTR               |
| cg19014730        | 0.024598834                              | ns                    | 0.64924611                             | ns                    | 5'UTR               |
| cg23416081        | 0.051070684                              | ns                    | 0.656993852                            | ns                    | 5'UTR               |
| cg08586216        | 0.213968836                              | ns                    | 0.664922547                            | ns                    | 5'UTR               |
| cg02665568        | 0.002103952                              | ns                    | 0.739132841                            | ns                    | Body                |
| cg15929276        | 0.31636485                               | ns                    | 0.744679253                            | ns                    | 5'UTR               |
| cg00140191        | 0.121851127                              | ns                    | 0.848214121                            | ns                    | Promoter Associated |
| cg11845071        | 0.044082904                              | ns                    | 0.849839854                            | ns                    | Promoter Associated |
| cg07633853        | 0.0000327                                | Significant           | 0.882618756                            | ns                    | Body                |
| cg16012111        | 0.162688928                              | ns                    | 0.951652076                            | ns                    | Promoter Associated |

**Note:** Bonferroni significance set at .0015 for *FKBP5* (34 CpG sites); Significance after controlling for demographic factors.
